# Supplementary material for: A qualitative investigation of reasoning behind decisions to decline participation in a research intervention: A study-within-a-trial
Source: PubMed Central journal article supplement — J Health Psychol. 2021 Aug 6;28(4):374–87. doi: 10.1177/13591053211037736 (PMC10026151; doi:10.1177/13591053211037736), 2021-08-06
Supplement: sj-pdf-4-hpq-10.1177_13591053211037736.pdf [file sj-pdf-4-hpq-10.1177_13591053211037736.pdf]

**Included Files**

The files included: Title Page, Manuscript, Appendix A and Data set; have been submitted as required by the journal, in fulfilment of publication consideration in MS Word format.

The authors suggest that replication can be conducted through using a similar methodology as that used within the manuscript.
